# Supplementary material
Source: publisher figshare collection journal article supplement (https://frontiersin.figshare.com/ndownloader/files/35470844)
Supplement: Supplementary file [file 35470844]

| SDI values for GBD 2019 locations                |       |
|--------------------------------------------------|-------|
| Location                                         | 2019  |
| Global                                           | 0·651 |
| Central Europe, eastern Europe, and central Asia | 0·76  |
| Central Asia                                     | 0·663 |
| Armenia                                          | 0·689 |
| Azerbaijan                                       | 0·683 |
| Georgia                                          | 0·702 |
| Kazakhstan                                       | 0·723 |
| Kyrgyzstan                                       | 0·596 |
| Mongolia                                         | 0·606 |
| Tajikistan                                       | 0·539 |
| Turkmenistan                                     | 0·67  |
| Uzbekistan                                       | 0·631 |
| Central Europe                                   | 0·788 |
| Albania                                          | 0·681 |
| Bosnia and Herzegovina                           | 0·718 |
| Bulgaria                                         | 0·764 |
| Croatia                                          | 0·794 |
| Czech Republic                                   | 0·828 |
| Hungary                                          | 0·791 |
| Montenegro                                       | 0·791 |
| North Macedonia                                  | 0·744 |
| Poland                                           | 0·802 |
| Romania                                          | 0·76  |
| Serbia                                           | 0·767 |
| Slovakia                                         | 0·812 |
| Slovenia                                         | 0·84  |
| Eastern Europe                                   | 0·793 |
| Belarus                                          | 0·745 |
| Estonia                                          | 0·835 |
| Latvia                                           | 0·82  |
| Lithuania                                        | 0·843 |
| Moldova                                          | 0·696 |
| Russia                                           | 0·805 |
| Ukraine                                          | 0·736 |
| High income                                      | 0·847 |
| Australasia                                      | 0·84  |
| Australia                                        | 0·839 |
| New Zealand                                      | 0·84  |
| High-income Asia Pacific                         | 0·873 |
| Brunei                                           | 0·823 |
| Japan                                            | 0·87  |
| Aichi                                            | 0·881 |
| Akita                                            | 0·83  |
| Aomori                                           | 0·826 |
| Chiba                                            | 0·861 |
| Ehime                                            | 0·841 |
| Fukui                                            | 0·854 |

| SDI values for GBD 2019 locations |       |
|-----------------------------------|-------|
| Location                          | 2019  |
| Fukuoka                           | 0·858 |
| Fukushima                         | 0·836 |
| Gifu                              | 0·852 |
| Gunma                             | 0·858 |
| Hiroshima                         | 0·868 |
| Hokkaidō                          | 0·843 |
| Hyōgo                             | 0·866 |
| Ibaraki                           | 0·858 |
| Ishikawa                          | 0·856 |
| Iwate                             | 0·831 |
| Kagawa                            | 0·855 |
| Kagoshima                         | 0·831 |
| Kanagawa                          | 0·882 |
| Kōchi                             | 0·832 |
| Kumamoto                          | 0·834 |
| Kyōto                             | 0·875 |
| Mie                               | 0·859 |
| Miyagi                            | 0·857 |
| Miyazaki                          | 0·826 |
| Nagano                            | 0·856 |
| Nagasaki                          | 0·827 |
| Nara                              | 0·851 |
| Niigata                           | 0·845 |
| Ōita                              | 0·847 |
| Okayama                           | 0·861 |
| Okinawa                           | 0·819 |
| Ōsaka                             | 0·875 |
| Saga                              | 0·834 |
| Saitama                           | 0·856 |
| Shiga                             | 0·874 |
| Shimane                           | 0·836 |
| Shizuoka                          | 0·864 |
| Tochigi                           | 0·859 |
| Tokushima                         | 0·854 |
| Tōkyō                             | 0·927 |
| Tottori                           | 0·835 |
| Toyama                            | 0·863 |
| Wakayama                          | 0·848 |
| Yamagata                          | 0·835 |
| Yamaguchi                         | 0·855 |
| Yamanashi                         | 0·858 |
| South Korea                       | 0·878 |
| Singapore                         | 0·861 |
| High-income North America         | 0·86  |
| Canada                            | 0·873 |
| Greenland                         | 0·761 |
| USA                               | 0·859 |

# SDI values for GBD 2019 locations

| Location       | 2019  |
|----------------|-------|
| Alabama        | 0·819 |
| Alaska         | 0·851 |
| Arizona        | 0·842 |
| Arkansas       | 0·811 |
| California     | 0·87  |
| Colorado       | 0·877 |
| Connecticut    | 0·902 |
| Delaware       | 0·863 |
| Washington, DC | 0·886 |
| Florida        | 0·856 |
| Georgia        | 0·841 |
| Hawaii         | 0·86  |
| Idaho          | 0·827 |
| Illinois       | 0·872 |
| Indiana        | 0·838 |
| Iowa           | 0·864 |
| Kansas         | 0·858 |
| Kentucky       | 0·815 |
| Louisiana      | 0·823 |
| Maine          | 0·862 |
| Maryland       | 0·887 |
| Massachusetts  | 0·907 |
| Michigan       | 0·863 |
| Minnesota      | 0·886 |
| Mississippi    | 0·805 |
| Missouri       | 0·844 |
| Montana        | 0·856 |
| Nebraska       | 0·862 |
| Nevada         | 0·835 |
| New Hampshire  | 0·898 |
| New Jersey     | 0·892 |
| New Mexico     | 0·826 |
| New York       | 0·884 |
| North Carolina | 0·838 |
| North Dakota   | 0·876 |
| Ohio           | 0·846 |
| Oklahoma       | 0·827 |
| Oregon         | 0·868 |
| Pennsylvania   | 0·87  |
| Rhode Island   | 0·882 |
| South Carolina | 0·832 |
| South Dakota   | 0·85  |
| Tennessee      | 0·827 |
| Texas          | 0·835 |
| Utah           | 0·851 |
| Vermont        | 0·889 |
| Virginia       | 0·877 |

| SDI values for GBD 2019 locations |       |
|-----------------------------------|-------|
| Location                          | 2019  |
| Washington                        | 0·876 |
| West Virginia                     | 0·812 |
| Wisconsin                         | 0·869 |
| Wyoming                           | 0·856 |
| Southern Latin America            | 0·721 |
| Argentina                         | 0·708 |
| Chile                             | 0·759 |
| Uruguay                           | 0·697 |
| Western Europe                    | 0·843 |
| Andorra                           | 0·894 |
| Austria                           | 0·849 |
| Belgium                           | 0·851 |
| Cyprus                            | 0·841 |
| Denmark                           | 0·89  |
| Finland                           | 0·856 |
| France                            | 0·834 |
| Germany                           | 0·898 |
| Greece                            | 0·794 |
| Iceland                           | 0·869 |
| Ireland                           | 0·867 |
| Israel                            | 0·803 |
| Italy                             | 0·801 |
| Luxembourg                        | 0·895 |
| Malta                             | 0·801 |
| Monaco                            | 0·902 |
| Netherlands                       | 0·883 |
| Norway                            | 0·913 |
| Portugal                          | 0·743 |
| San Marino                        | 0·884 |
| Spain                             | 0·767 |
| Sweden                            | 0·872 |
| Stockholm                         | 0·904 |
| Sweden except Stockholm           | 0·86  |
| Switzerland                       | 0·929 |
| UK                                | 0·847 |
| England                           | 0·85  |
| East Midlands                     | 0·826 |
| Derby                             | 0·841 |
| Derbyshire                        | 0·814 |
| Leicester                         | 0·823 |
| Leicestershire                    | 0·845 |
| Lincolnshire                      | 0·81  |
| Northamptonshire                  | 0·827 |
| Nottingham                        | 0·852 |
| Nottinghamshire                   | 0·811 |
| Rutland                           | 0·844 |
| East of England                   | 0·844 |

## SDI values for GBD 2019 locations

| Location               | 2019  |
|------------------------|-------|
| Bedford                | 0·847 |
| Cambridgeshire         | 0·877 |
| Central Bedfordshire   | 0·841 |
| Essex                  | 0·833 |
| Hertfordshire          | 0·877 |
| Luton                  | 0·832 |
| Norfolk                | 0·823 |
| Peterborough           | 0·818 |
| Southend-on-Sea        | 0·812 |
| Suffolk                | 0·827 |
| Thurrock               | 0·804 |
| Greater London         | 0·895 |
| Barking and Dagenham   | 0·79  |
| Barnet                 | 0·878 |
| Bexley                 | 0·833 |
| Brent                  | 0·851 |
| Bromley                | 0·858 |
| Camden                 | 0·931 |
| Croydon                | 0·84  |
| Ealing                 | 0·872 |
| Enfield                | 0·836 |
| Greenwich              | 0·834 |
| Hackney                | 0·882 |
| Hammersmith and Fulham | 0·929 |
| Haringey               | 0·86  |
| Harrow                 | 0·854 |
| Havering               | 0·823 |
| Hillingdon             | 0·882 |
| Hounslow               | 0·885 |
| Islington              | 0·918 |
| Kensington and Chelsea | 0·941 |
| Kingston upon Thames   | 0·902 |
| Lambeth                | 0·906 |
| Lewisham               | 0·846 |
| Merton                 | 0·876 |
| Newham                 | 0·831 |
| Redbridge              | 0·841 |
| Richmond upon Thames   | 0·924 |
| Southwark              | 0·91  |
| Sutton                 | 0·849 |
| Tower Hamlets          | 0·896 |
| Waltham Forest         | 0·827 |
| Wandsworth             | 0·918 |
| Westminster            | 0·93  |
| North East England     | 0·819 |
| County Durham          | 0·805 |
| Darlington             | 0·826 |

## SDI values for GBD 2019 locations

| Location                  | 2019  |
|---------------------------|-------|
| Gateshead                 | 0·822 |
| Hartlepool                | 0·786 |
| Middlesbrough             | 0·796 |
| Newcastle upon Tyne       | 0·866 |
| North Tyneside            | 0·826 |
| Northumberland            | 0·814 |
| Redcar and Cleveland      | 0·791 |
| South Tyneside            | 0·792 |
| Stockton-on-Tees          | 0·822 |
| Sunderland                | 0·81  |
| North West England        | 0·832 |
| Blackburn with Darwen     | 0·798 |
| Blackpool                 | 0·772 |
| Bolton                    | 0·8   |
| Bury                      | 0·819 |
| Cheshire East             | 0·87  |
| Cheshire West and Chester | 0·862 |
| Cumbria                   | 0·83  |
| Halton                    | 0·819 |
| Knowsley                  | 0·8   |
| Lancashire                | 0·831 |
| Liverpool                 | 0·842 |
| Manchester                | 0·873 |
| Oldham                    | 0·781 |
| Rochdale                  | 0·79  |
| Salford                   | 0·827 |
| Sefton                    | 0·812 |
| St Helens                 | 0·797 |
| Stockport                 | 0·85  |
| Tameside                  | 0·79  |
| Trafford                  | 0·881 |
| Warrington                | 0·866 |
| Wigan                     | 0·793 |
| Wirral                    | 0·806 |
| South East England        | 0·864 |
| Bracknell Forest          | 0·878 |
| Brighton and Hove         | 0·891 |
| Buckinghamshire           | 0·877 |
| East Sussex               | 0·827 |
| Hampshire                 | 0·862 |
| Isle of Wight             | 0·805 |
| Kent                      | 0·833 |
| Medway                    | 0·807 |
| Milton Keynes             | 0·87  |
| Oxfordshire               | 0·89  |
| Portsmouth                | 0·858 |
| Reading                   | 0·896 |

**SDI values for GBD 2019 locations**

| Location                     | 2019  |
|------------------------------|-------|
| Slough                       | 0·864 |
| Southampton                  | 0·855 |
| Surrey                       | 0·895 |
| West Berkshire               | 0·883 |
| West Sussex                  | 0·854 |
| Windsor and Maidenhead       | 0·905 |
| Wokingham                    | 0·904 |
| South West England           | 0·848 |
| Bath and North East Somerset | 0·886 |
| Bournemouth                  | 0·861 |
| Bristol, City of             | 0·886 |
| Cornwall                     | 0·825 |
| Devon                        | 0·843 |
| Dorset                       | 0·835 |
| Gloucestershire              | 0·859 |
| North Somerset               | 0·843 |
| Plymouth                     | 0·834 |
| Poole                        | 0·85  |
| Somerset                     | 0·826 |
| South Gloucestershire        | 0·873 |
| Swindon                      | 0·85  |
| Torbay                       | 0·793 |
| Wiltshire                    | 0·844 |
| West Midlands                | 0·825 |
| Birmingham                   | 0·827 |
| Coventry                     | 0·84  |
| Dudley                       | 0·79  |
| Herefordshire, County of     | 0·832 |
| Sandwell                     | 0·781 |
| Shropshire                   | 0·832 |
| Solihull                     | 0·858 |
| Staffordshire                | 0·819 |
| Stoke-on-Trent               | 0·786 |
| Telford and Wrekin           | 0·813 |
| Walsall                      | 0·779 |
| Warwickshire                 | 0·857 |
| Wolverhampton                | 0·799 |
| Worcestershire               | 0·831 |
| Yorkshire and the Humber     | 0·826 |
| Barnsley                     | 0·774 |
| Bradford                     | 0·8   |
| Calderdale                   | 0·821 |
| Doncaster                    | 0·783 |
| East Riding of Yorkshire     | 0·821 |
| Kingston upon Hull, City of  | 0·792 |
| Kirklees                     | 0·81  |
| Leeds                        | 0·864 |

| SDI values for GBD 2019 locations |       |
|-----------------------------------|-------|
| Location                          | 2019  |
| North East Lincolnshire           | 0·784 |
| North Lincolnshire                | 0·806 |
| North Yorkshire                   | 0·838 |
| Rotherham                         | 0·784 |
| Sheffield                         | 0·848 |
| Wakefield                         | 0·792 |
| York                              | 0·883 |
| Northern Ireland                  | 0·825 |
| Scotland                          | 0·834 |
| Wales                             | 0·82  |
| Latin America and Caribbean       | 0·633 |
| Andean Latin America              | 0·632 |
| Bolivia                           | 0·566 |
| Ecuador                           | 0·64  |
| Peru                              | 0·648 |
| Caribbean                         | 0·631 |
| Antigua and Barbuda               | 0·743 |
| The Bahamas                       | 0·796 |
| Barbados                          | 0·742 |
| Belize                            | 0·603 |
| Bermuda                           | 0·813 |
| Cuba                              | 0·668 |
| Dominica                          | 0·729 |
| Dominican Republic                | 0·592 |
| Grenada                           | 0·669 |
| Guyana                            | 0·618 |
| Haiti                             | 0·432 |
| Jamaica                           | 0·684 |
| Puerto Rico                       | 0·814 |
| Saint Kitts and Nevis             | 0·746 |
| Saint Lucia                       | 0·67  |
| Saint Vincent and the Grenadines  | 0·627 |
| Suriname                          | 0·636 |
| Trinidad and Tobago               | 0·757 |
| Virgin Islands                    | 0·799 |
| Central Latin America             | 0·626 |
| Colombia                          | 0·633 |
| Costa Rica                        | 0·68  |
| El Salvador                       | 0·573 |
| Guatemala                         | 0·526 |
| Honduras                          | 0·496 |
| Mexico                            | 0·649 |
| Aguascalientes                    | 0·673 |
| Baja California                   | 0·688 |
| Baja California Sur               | 0·693 |
| Campeche                          | 0·648 |
| Chiapas                           | 0·557 |

## SDI values for GBD 2019 locations

| Location                        | 2019  |
|---------------------------------|-------|
| Chihuahua                       | 0·659 |
| Coahuila                        | 0·663 |
| Colima                          | 0·682 |
| Durango                         | 0·618 |
| Guanajuato                      | 0·634 |
| Guerrero                        | 0·572 |
| Hidalgo                         | 0·611 |
| Jalisco                         | 0·665 |
| México                          | 0·66  |
| Mexico City                     | 0·732 |
| Michoacán de Ocampo             | 0·606 |
| Morelos                         | 0·654 |
| Nayarit                         | 0·643 |
| Nuevo León                      | 0·699 |
| Oaxaca                          | 0·574 |
| Puebla                          | 0·612 |
| Querétaro                       | 0·671 |
| Quintana Roo                    | 0·67  |
| San Luis Potosí                 | 0·635 |
| Sinaloa                         | 0·667 |
| Sonora                          | 0·687 |
| Tabasco                         | 0·638 |
| Tamaulipas                      | 0·666 |
| Tlaxcala                        | 0·64  |
| Veracruz de Ignacio de la Llave | 0·609 |
| Yucatán                         | 0·64  |
| Zacatecas                       | 0·63  |
| Nicaragua                       | 0·517 |
| Panama                          | 0·686 |
| Venezuela                       | 0·607 |
| Tropical Latin America          | 0·64  |
| Brazil                          | 0·64  |
| Acre                            | 0·562 |
| Alagoas                         | 0·518 |
| Amapá                           | 0·641 |
| Amazonas                        | 0·602 |
| Bahia                           | 0·562 |
| Ceará                           | 0·558 |
| Distrito Federal                | 0·777 |
| Espírito Santo                  | 0·66  |
| Goiás                           | 0·628 |
| Maranhão                        | 0·444 |
| Mato Grosso                     | 0·642 |
| Mato Grosso do Sul              | 0·639 |
| Minas Gerais                    | 0·643 |
| Pará                            | 0·569 |
| Paraíba                         | 0·548 |

| SDI values for GBD 2019 locations |       |
|-----------------------------------|-------|
| Location                          | 2019  |
| Paraná                            | 0·662 |
| Pernambuco                        | 0·571 |
| Piauí                             | 0·509 |
| Rio de Janeiro                    | 0·702 |
| Rio Grande do Norte               | 0·576 |
| Rio Grande do Sul                 | 0·684 |
| Rondônia                          | 0·606 |
| Roraima                           | 0·61  |
| Santa Catarina                    | 0·691 |
| São Paulo                         | 0·702 |
| Sergipe                           | 0·583 |
| Tocantins                         | 0·583 |
| Paraguay                          | 0·638 |
| North Africa and Middle East      | 0·66  |
| North Africa and Middle East      | 0·66  |
| Afghanistan                       | 0·343 |
| Algeria                           | 0·652 |
| Bahrain                           | 0·751 |
| Egypt                             | 0·658 |
| Iran                              | 0·67  |
| Iraq                              | 0·671 |
| Jordan                            | 0·731 |
| Kuwait                            | 0·851 |
| Lebanon                           | 0·708 |
| Libya                             | 0·709 |
| Morocco                           | 0·548 |
| Oman                              | 0·783 |
| Palestine                         | 0·588 |
| Qatar                             | 0·83  |
| Saudi Arabia                      | 0·805 |
| Sudan                             | 0·515 |
| Syria                             | 0·619 |
| Tunisia                           | 0·672 |
| Turkey                            | 0·748 |
| United Arab Emirates              | 0·88  |
| Yemen                             | 0·412 |
| South Asia                        | 0·543 |
| South Asia                        | 0·543 |
| Bangladesh                        | 0·483 |
| Bhutan                            | 0·455 |
| India                             | 0·566 |
| Andhra Pradesh                    | 0·546 |
| Arunachal Pradesh                 | 0·566 |
| Assam                             | 0·551 |
| Bihar                             | 0·444 |
| Chhattisgarh                      | 0·533 |
| Delhi                             | 0·717 |

## SDI values for GBD 2019 locations

| Location                               | 2019  |
|----------------------------------------|-------|
| Goa                                    | 0·717 |
| Gujarat                                | 0·609 |
| Haryana                                | 0·609 |
| Himachal Pradesh                       | 0·638 |
| Jammu and Kashmir                      | 0·605 |
| Jharkhand                              | 0·51  |
| Karnataka                              | 0·598 |
| Kerala                                 | 0·671 |
| Madhya Pradesh                         | 0·505 |
| Maharashtra                            | 0·628 |
| Manipur                                | 0·595 |
| Meghalaya                              | 0·564 |
| Mizoram                                | 0·621 |
| Nagaland                               | 0·618 |
| Odisha                                 | 0·542 |
| Punjab                                 | 0·623 |
| Rajasthan                              | 0·521 |
| Sikkim                                 | 0·64  |
| Tamil Nadu                             | 0·621 |
| Telangana                              | 0·572 |
| Tripura                                | 0·557 |
| Union Territories other than Delhi     | 0·664 |
| Uttar Pradesh                          | 0·513 |
| Uttarakhand                            | 0·628 |
| West Bengal                            | 0·545 |
| Nepal                                  | 0·422 |
| Pakistan                               | 0·449 |
| Southeast Asia, east Asia, and Oceania | 0·673 |
| East Asia                              | 0·691 |
| China                                  | 0·686 |
| North Korea                            | 0·558 |
| Taiwan (province of China)             | 0·868 |
| Oceania                                | 0·452 |
| American Samoa                         | 0·712 |
| Cook Islands                           | 0·764 |
| Fiji                                   | 0·664 |
| Guam                                   | 0·813 |
| Kiribati                               | 0·527 |
| Marshall Islands                       | 0·544 |
| Federated States of Micronesia         | 0·58  |
| Nauru                                  | 0·618 |
| Niue                                   | 0·711 |
| Northern Mariana Islands               | 0·771 |
| Palau                                  | 0·738 |
| Papua New Guinea                       | 0·394 |
| Samoa                                  | 0·641 |
| Solomon Islands                        | 0·407 |

## SDI values for GBD 2019 locations

| Location                | 2019  |
|-------------------------|-------|
| Tokelau                 | 0·626 |
| Tonga                   | 0·636 |
| Tuvalu                  | 0·589 |
| Vanuatu                 | 0·485 |
| Southeast Asia          | 0·644 |
| Cambodia                | 0·469 |
| Indonesia               | 0·66  |
| Aceh                    | 0·666 |
| Bali                    | 0·648 |
| Bangka-Belitung Islands | 0·647 |
| Banten                  | 0·642 |
| Bengkulu                | 0·619 |
| Gorontalo               | 0·569 |
| Jakarta                 | 0·802 |
| Jambi                   | 0·641 |
| West Java               | 0·648 |
| Central Java            | 0·613 |
| East Java               | 0·646 |
| West Kalimantan         | 0·598 |
| South Kalimantan        | 0·636 |
| Central Kalimantan      | 0·653 |
| East Kalimantan         | 0·762 |
| North Kalimantan        | 0·758 |
| Riau Islands            | 0·742 |
| Lampung                 | 0·617 |
| Maluku                  | 0·575 |
| North Maluku            | 0·562 |
| West Nusa Tenggara      | 0·582 |
| East Nusa Tenggara      | 0·543 |
| Papua                   | 0·629 |
| West Papua              | 0·666 |
| Riau                    | 0·727 |
| West Sulawesi           | 0·573 |
| South Sulawesi          | 0·626 |
| Central Sulawesi        | 0·628 |
| Southeast Sulawesi      | 0·612 |
| North Sulawesi          | 0·664 |
| West Sumatra            | 0·668 |
| South Sumatra           | 0·657 |
| North Sumatra           | 0·675 |
| Yogyakarta              | 0·671 |
| Laos                    | 0·49  |
| Malaysia                | 0·737 |
| Maldives                | 0·562 |
| Mauritius               | 0·705 |
| Myanmar                 | 0·521 |
| Philippines             | 0·623 |

| SDI values for GBD 2019 locations |       |
|-----------------------------------|-------|
| Location                          | 2019  |
| Seychelles                        | 0.724 |
| Sri Lanka                         | 0.69  |
| Thailand                          | 0.687 |
| Timor-Leste                       | 0.514 |
| Vietnam                           | 0.617 |
| Sub-Saharan Africa                | 0.456 |
| Central sub-Saharan Africa        | 0.47  |
| Angola                            | 0.47  |
| Central African Republic          | 0.274 |
| Congo (Brazzaville)               | 0.568 |
| DR Congo                          | 0.382 |
| Equatorial Guinea                 | 0.685 |
| Gabon                             | 0.656 |
| Eastern sub-Saharan Africa        | 0.405 |
| Burundi                           | 0.284 |
| Comoros                           | 0.455 |
| Djibouti                          | 0.459 |
| Eritrea                           | 0.396 |
| Ethiopia                          | 0.343 |
| Kenya                             | 0.508 |
| Baringo                           | 0.476 |
| Bomet                             | 0.531 |
| Bungoma                           | 0.483 |
| Busia                             | 0.453 |
| Elgeyo Marakwet                   | 0.503 |
| Embu                              | 0.55  |
| Garissa                           | 0.31  |
| Homa Bay                          | 0.452 |
| Isiolo                            | 0.413 |
| Kajiado                           | 0.563 |
| Kakamega                          | 0.489 |
| Kericho                           | 0.509 |
| Kiambu                            | 0.609 |
| Kilifi                            | 0.492 |
| Kirinyaga                         | 0.546 |
| Kisii                             | 0.557 |
| Kisumu                            | 0.559 |
| Kitui                             | 0.474 |
| Kwale                             | 0.469 |
| Laikipia                          | 0.567 |
| Lamu                              | 0.488 |
| Machakos                          | 0.553 |
| Makueni                           | 0.462 |
| Mandera                           | 0.302 |
| Marsabit                          | 0.388 |
| Meru                              | 0.525 |
| Migori                            | 0.442 |

## SDI values for GBD 2019 locations

| Location                    | 2019  |
|-----------------------------|-------|
| Mombasa                     | 0.582 |
| Murang'a                    | 0.55  |
| Nairobi                     | 0.665 |
| Nakuru                      | 0.548 |
| Nandi                       | 0.543 |
| Narok                       | 0.418 |
| Nyamira                     | 0.579 |
| Nyandarua                   | 0.546 |
| Nyeri                       | 0.568 |
| Samburu                     | 0.361 |
| Siaya                       | 0.449 |
| Taita Taveta                | 0.539 |
| Tana River                  | 0.391 |
| Tharaka Nithi               | 0.564 |
| Trans Nzoia                 | 0.539 |
| Turkana                     | 0.355 |
| Uasin Gishu                 | 0.585 |
| Vihiga                      | 0.464 |
| Wajir                       | 0.259 |
| West Pokot                  | 0.422 |
| Madagascar                  | 0.396 |
| Malawi                      | 0.384 |
| Mozambique                  | 0.307 |
| Rwanda                      | 0.429 |
| Somalia                     | 0.081 |
| South Sudan                 | 0.363 |
| Uganda                      | 0.404 |
| Tanzania                    | 0.423 |
| Zambia                      | 0.505 |
| Southern sub-Saharan Africa | 0.642 |
| Botswana                    | 0.634 |
| eSwatini                    | 0.577 |
| Lesotho                     | 0.507 |
| Namibia                     | 0.612 |
| South Africa                | 0.678 |
| Zimbabwe                    | 0.476 |
| Western sub-Saharan Africa  | 0.448 |
| Benin                       | 0.352 |
| Burkina Faso                | 0.257 |
| Cape Verde                  | 0.525 |
| Cameroon                    | 0.49  |
| Chad                        | 0.238 |
| Côte d'Ivoire               | 0.408 |
| The Gambia                  | 0.399 |
| Ghana                       | 0.557 |
| Guinea                      | 0.325 |
| Guinea-Bissau               | 0.355 |

**SDI values for GBD 2019 locations**

| Location              | 2019  |
|-----------------------|-------|
| Liberia               | 0·37  |
| Mali                  | 0·263 |
| Mauritania            | 0·496 |
| Niger                 | 0·162 |
| Nigeria               | 0·515 |
| São Tomé and Príncipe | 0·502 |
| Senegal               | 0·389 |
| Sierra Leone          | 0·347 |
| Togo                  | 0·417 |
